# Supplementary material
Source: MDPI journal article supplement (https://www.mdpi.com/1660-4601/12/3/2344)
Supplement: s1 [file s1]

Map of the dental clinic

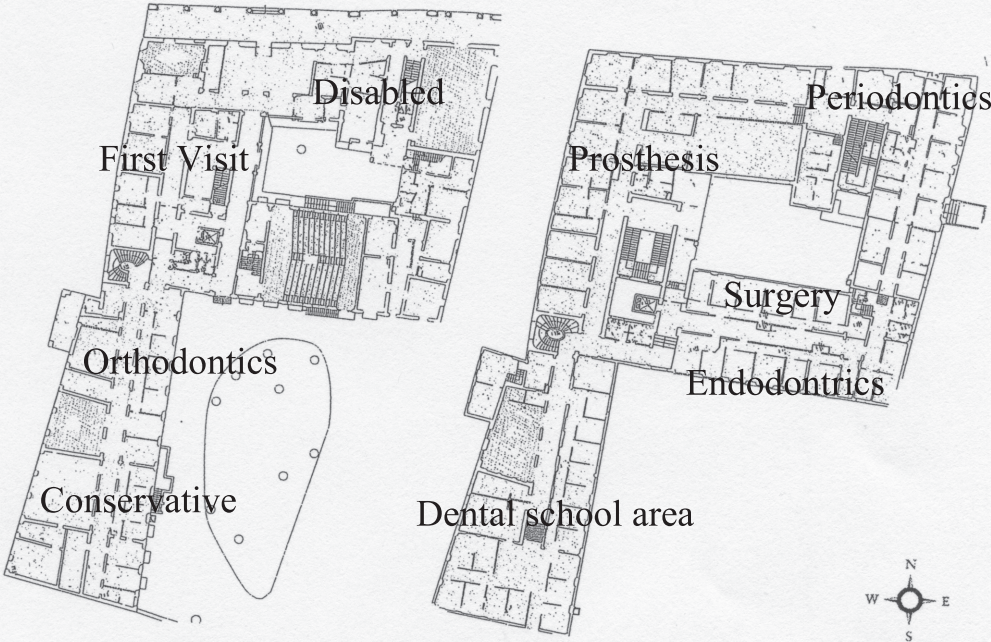

Ground Floor

First Floor
